# Supplementary material for: Industrial Silicon-Wafer-Wastage-Derived Carbon-Enfolded Si/Si-C/C Nanocomposite Anode Material through Plasma-Assisted Discharge Process for Rechargeable Li-Ion Storage
Source: MDPI journal article supplement (doi:10.3390/nano12040659), 2022-02-16
Supplement: s1 [file s1]

## Supplementary Materials

# Industrial Silicon-Wafer-Wastage-Derived Carbon-Enfolded Si/Si-C/C Nanocomposite Anode Material through Plasma-Assisted Discharge Process for Rechargeable Li-Ion Storage

Rasu Muruganantham <sup>1</sup>, Chih-Wei Yang <sup>2</sup>, Hong-Jyun Wang <sup>2</sup>, Chia-Hung Huang <sup>3,4</sup> and Wei-Ren Liu <sup>1,\*</sup>

<sup>1</sup> Department of Chemical Engineering, R&D Center for Membrane Technology, Center for Circular Economy, Chung Yuan Christian University, 200 Chung Pei Road, Chung Li District, Taoyuan City 32023, Taiwan; rmurugaphd@gmail.com

<sup>2</sup> Sino Applied Technology Co., Ltd., Chung Li District, Taoyuan City 320030, Taiwan; tyang89@gmail.com (C.-W.Y.); hongjyunwa@gmail.com (H.-J.W.)

<sup>3</sup> Department of Electrical Engineering, National University of Tainan, No.33, Sec. 2, Shulin St., West Central District, Tainan City 700, Taiwan; chiahung@mail.mirdc.org.tw

<sup>4</sup> Metal Industries Research and Development Centre, Kaohsiung 70101, Taiwan

\* Correspondence: wrliu1203@gmail.com; Tel.: +886-3-2653315; Fax: 886-3-2653399

## 1. Experimental physical and chemical characterization conditions

The crystal phase structure and purity were determined through X-ray powder diffraction (XRD) by using a Bruker D8 diffractometer with monochromatic  $\text{CuK}\alpha$  radiation. The diffractometer was operated at 40 kV and 20 mA with a wavelength ( $\lambda$ ) of 1.54060 Å. Diffraction data were recorded in a range  $2\theta = 10^\circ\text{--}80^\circ$ . The morphology of powders was investigated using a high-resolution transmission electron microscopic (HR-TEM, JEM2100). A Tristar 3000 was employed to accelerate the surface area, and a porosity instrument was used to measure the  $\text{N}_2$  adsorption/desorption isotherms of the prepared product.

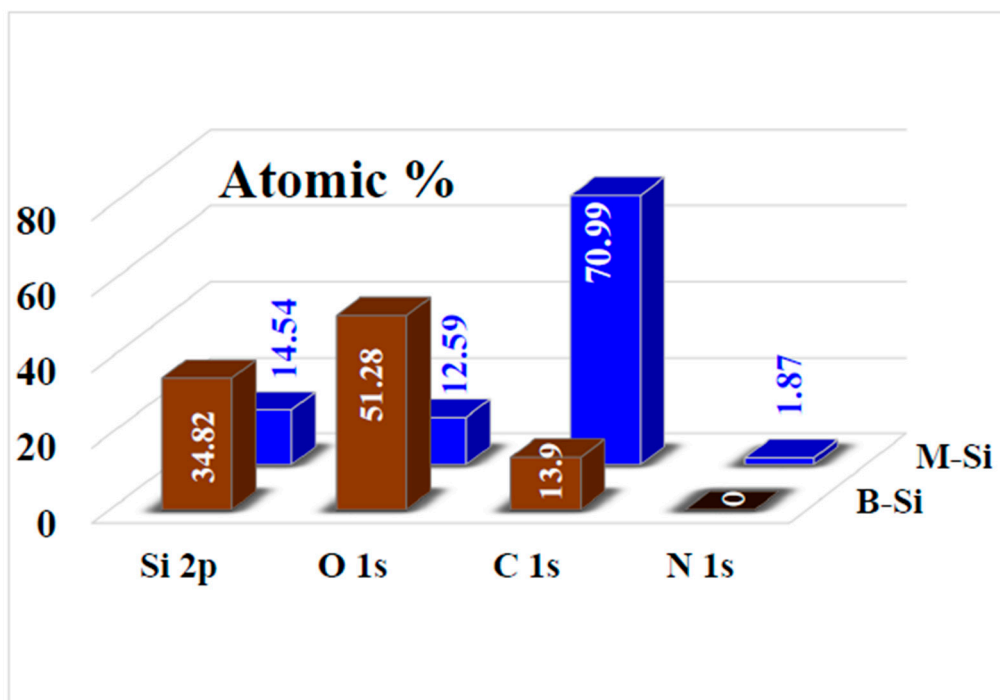

**Figure S1.** The M-Si and B-Si samples presence of elements atomic percentage estimated from XPS survey scan.

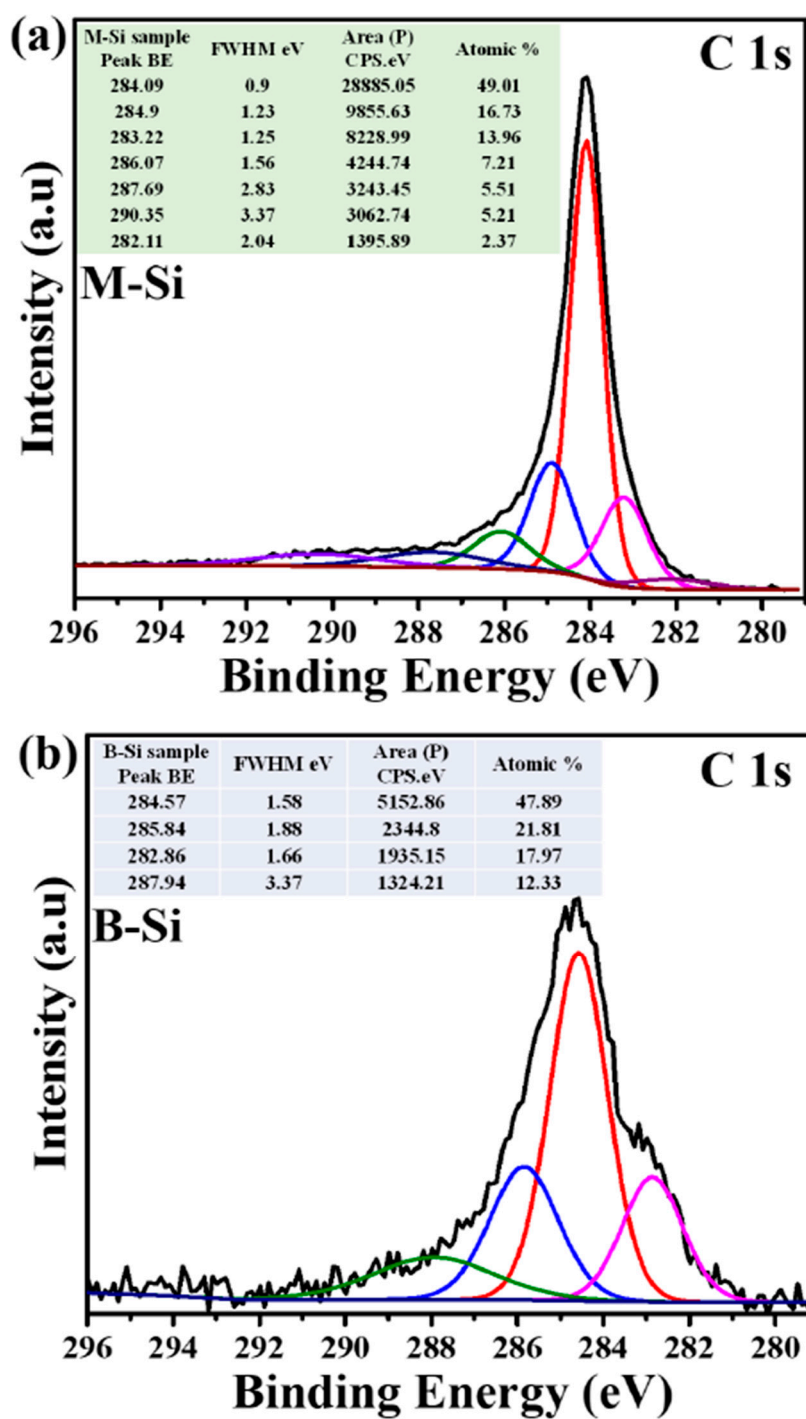

**Figure S2.** High-resolution C 1s XPS with deconvoluted fitted spectra of **(a)** M-Si and **(b)** B-Si samples, respectively.

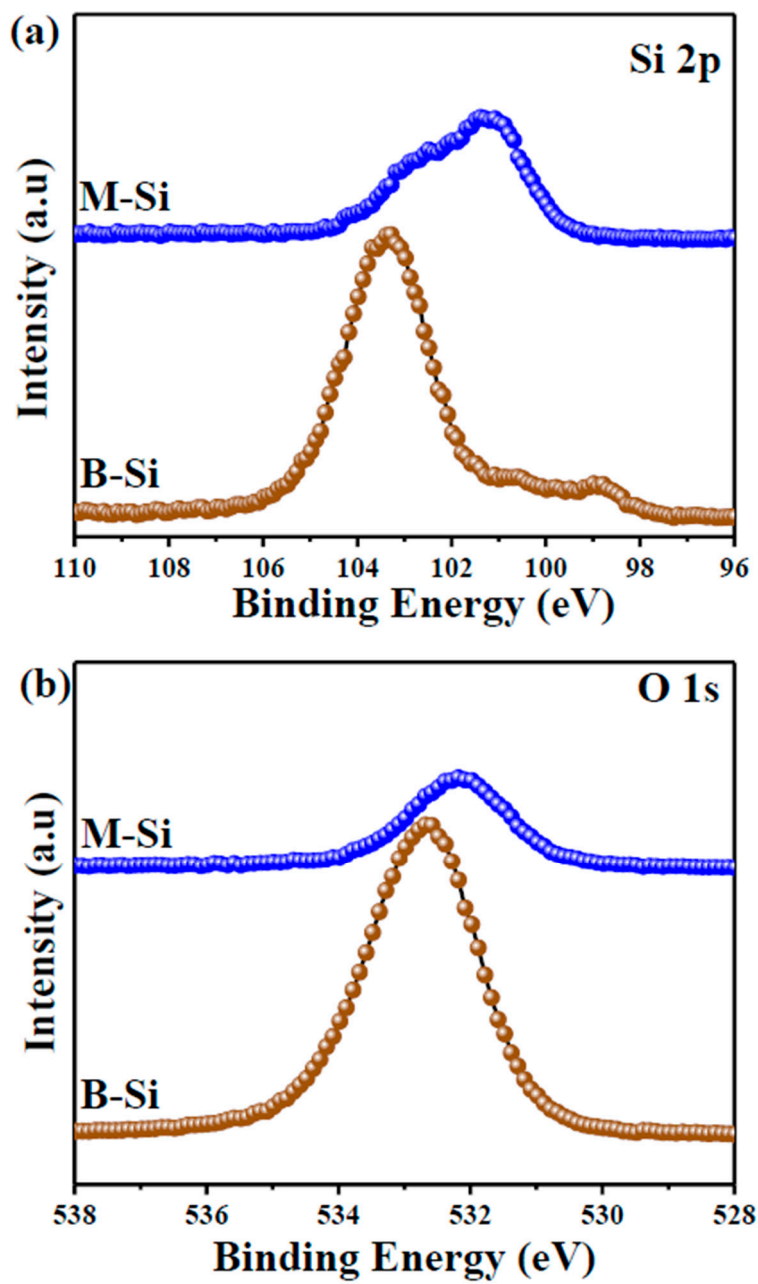

**Figure S3.** High-resolution O 1s XPS of (a) M-Si and (b) B-Si samples.

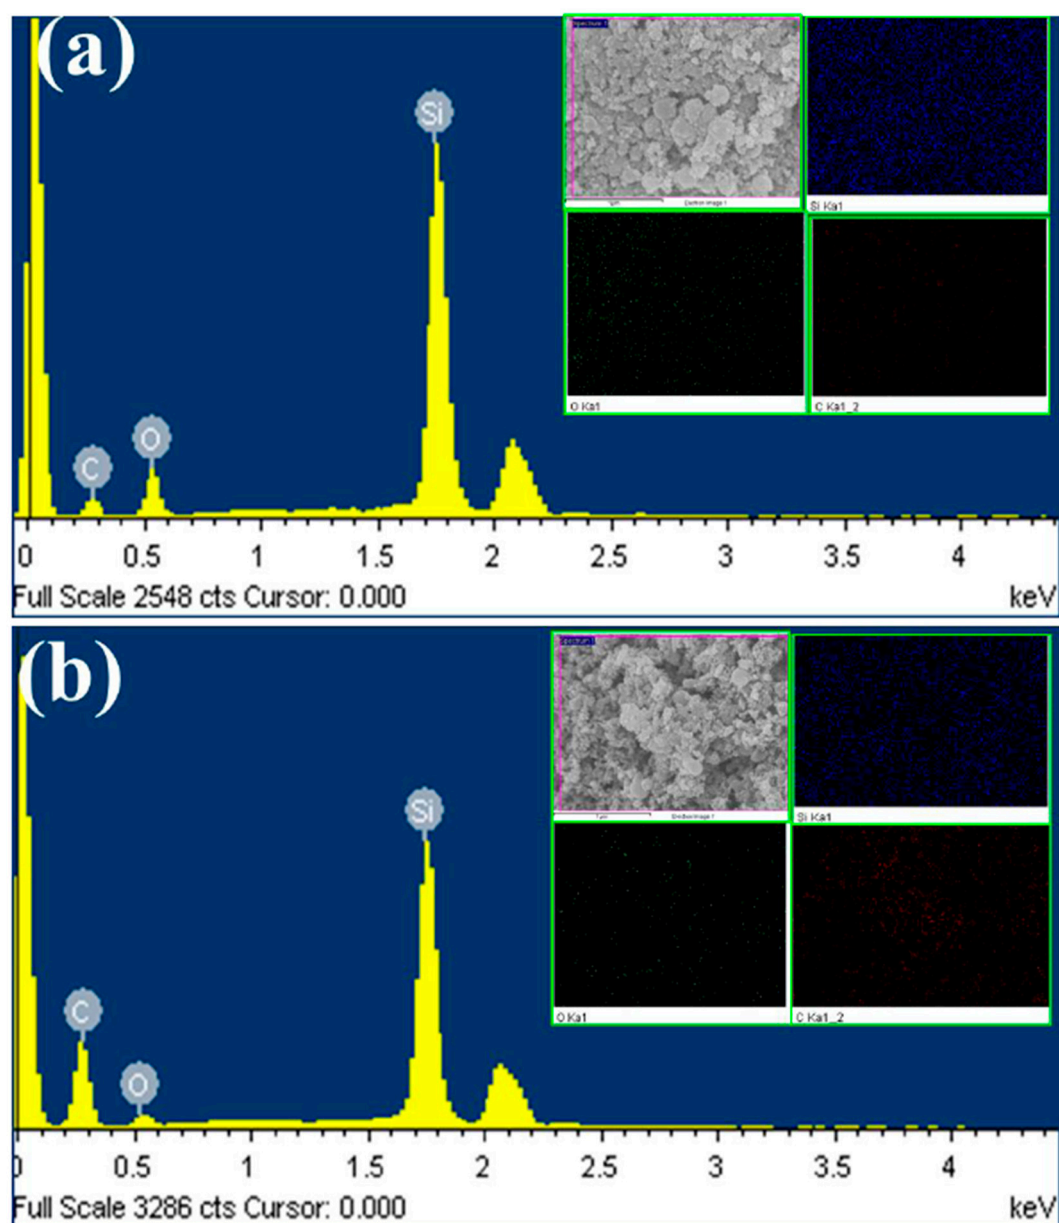

**Figure S4.** FE-SEM coupled EDX spectra of **(a)** M-Si and **(b)** B-Si samples, inset the corresponding E-mapping images.
